# Supplementary material for: Neat1 in hematopoietic stem cells
Source: Oncotarget. 2017 Nov 30;8(65):109575–86. doi: 10.18632/oncotarget.22729 (PMC5752543; doi:10.18632/oncotarget.22729)
Supplement: Supplementary file 1 [file oncotarget-08-109575-s001.pdf]

## ***Neat1* in hematopoietic stem cells**

### **SUPPLEMENTARY MATERIALS**

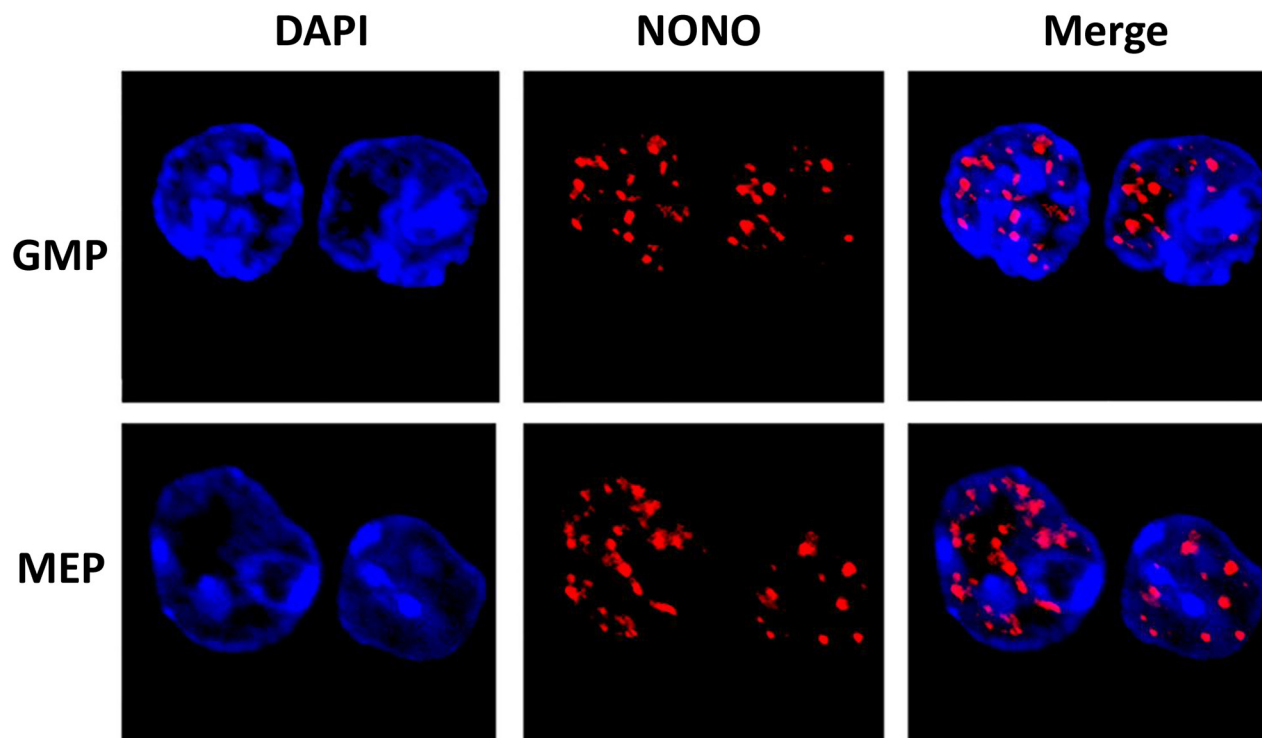

**Supplementary Figure 1: NONO Foci are concentrated in euchromatin areas of the nucleus.** Confocal microscopy analysis of NONO, a paraspeckle protein, using Immunofluorescent staining technique, in representative primary cell types GMP and MEP, enlarged. NONO (red) is superimposed over DNA stained with DAPI (blue).

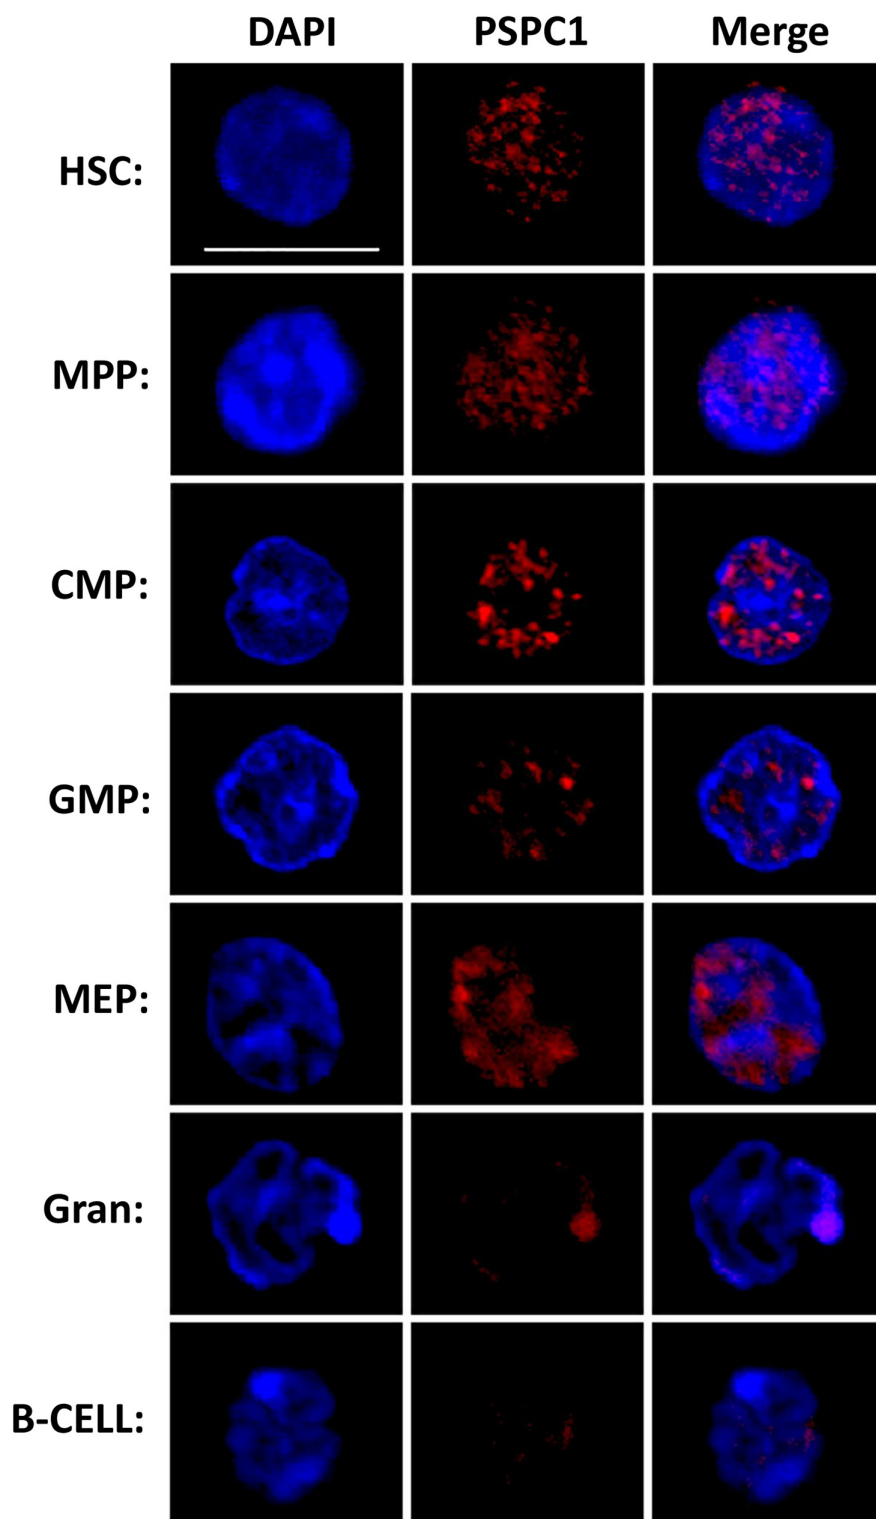

**Supplementary Figure 2: Paraspeckle protein PSPC1 presents aggregated clusters in hematopoietic cell's nuclei.** Confocal microscopy analysis of PSPC1, a paraspeckle protein, using an immunofluorescent staining technique, in representative primary cell types: HSC, MPP, CMP, GMP, MEP, granulocyte, B-Cell. PSPC1 (red) is superimposed over DAPI (blue). Scale bar denotes 10  $\mu$ m.

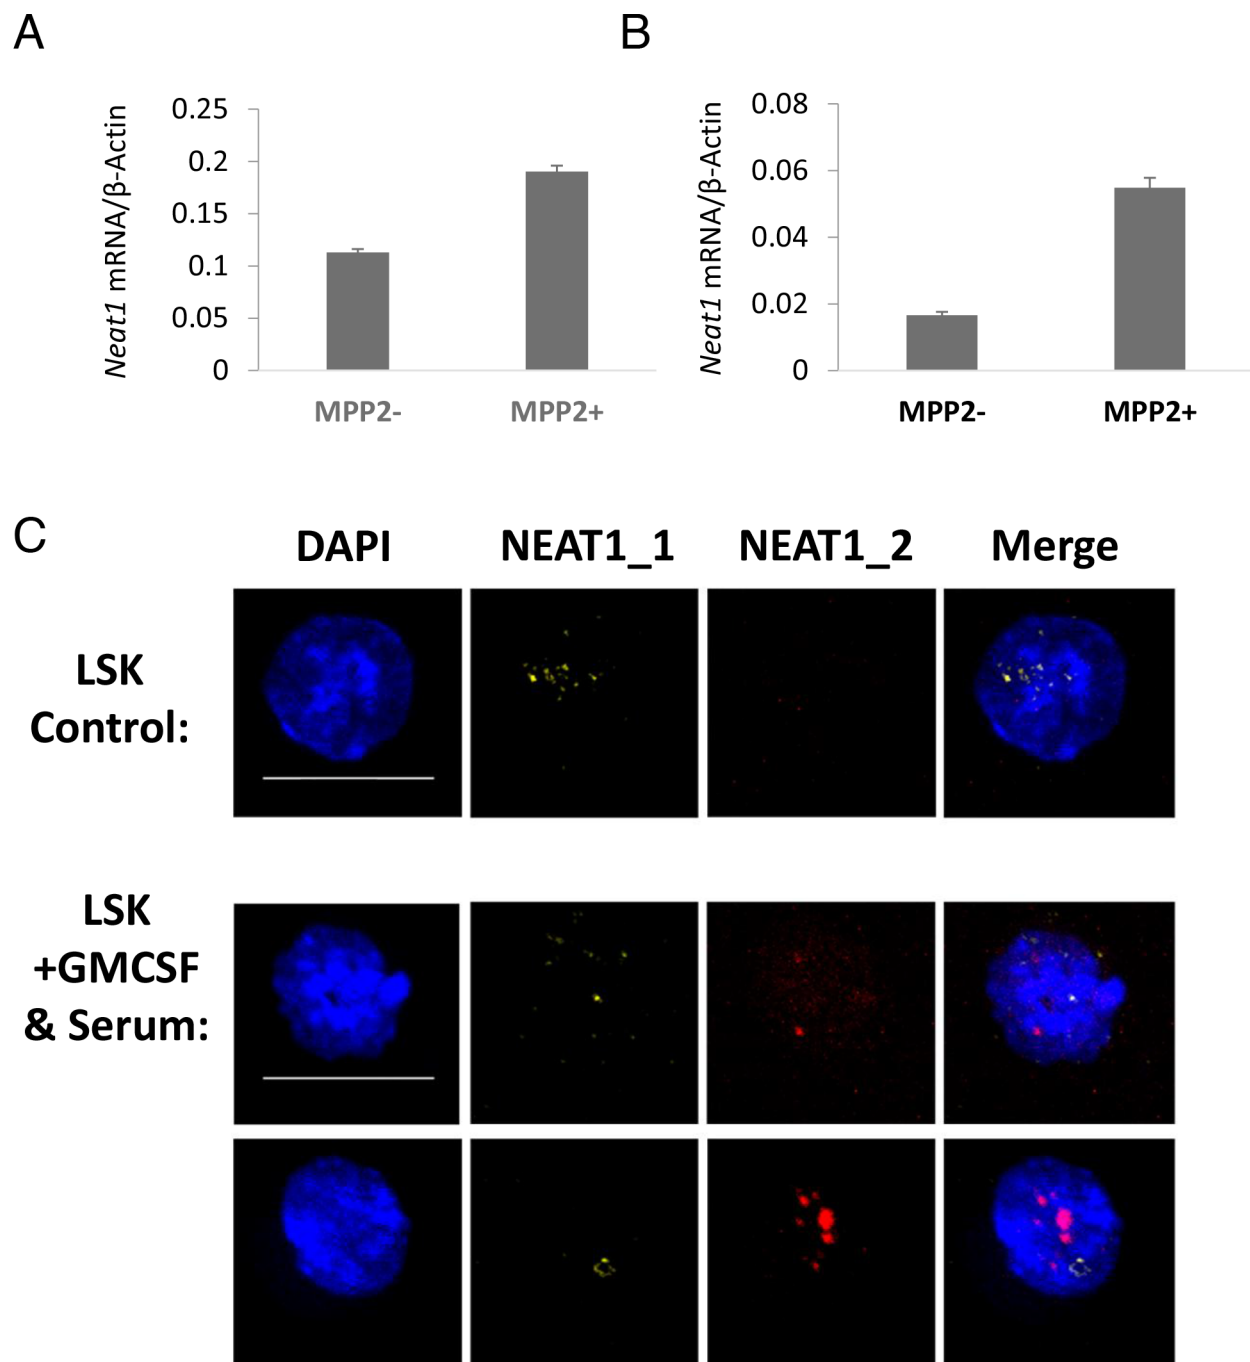

**Supplementary Figure 3: *Neat1* expression is enhanced by differentiation *in vitro*.** (A and B) Expression levels of *Neat1\_1* and *Neat1\_2* measured by RT-qPCR and shown relative to  $\beta$ -Actin. GM-CSF and Serum were added to the medium for the last 96 hours of the culture. Histograms show averages  $\pm$ SD. (C) Confocal microscopy FISH of *Neat1\_1* and *Neat1\_2*. Scale bar denotes 10  $\mu$ m.

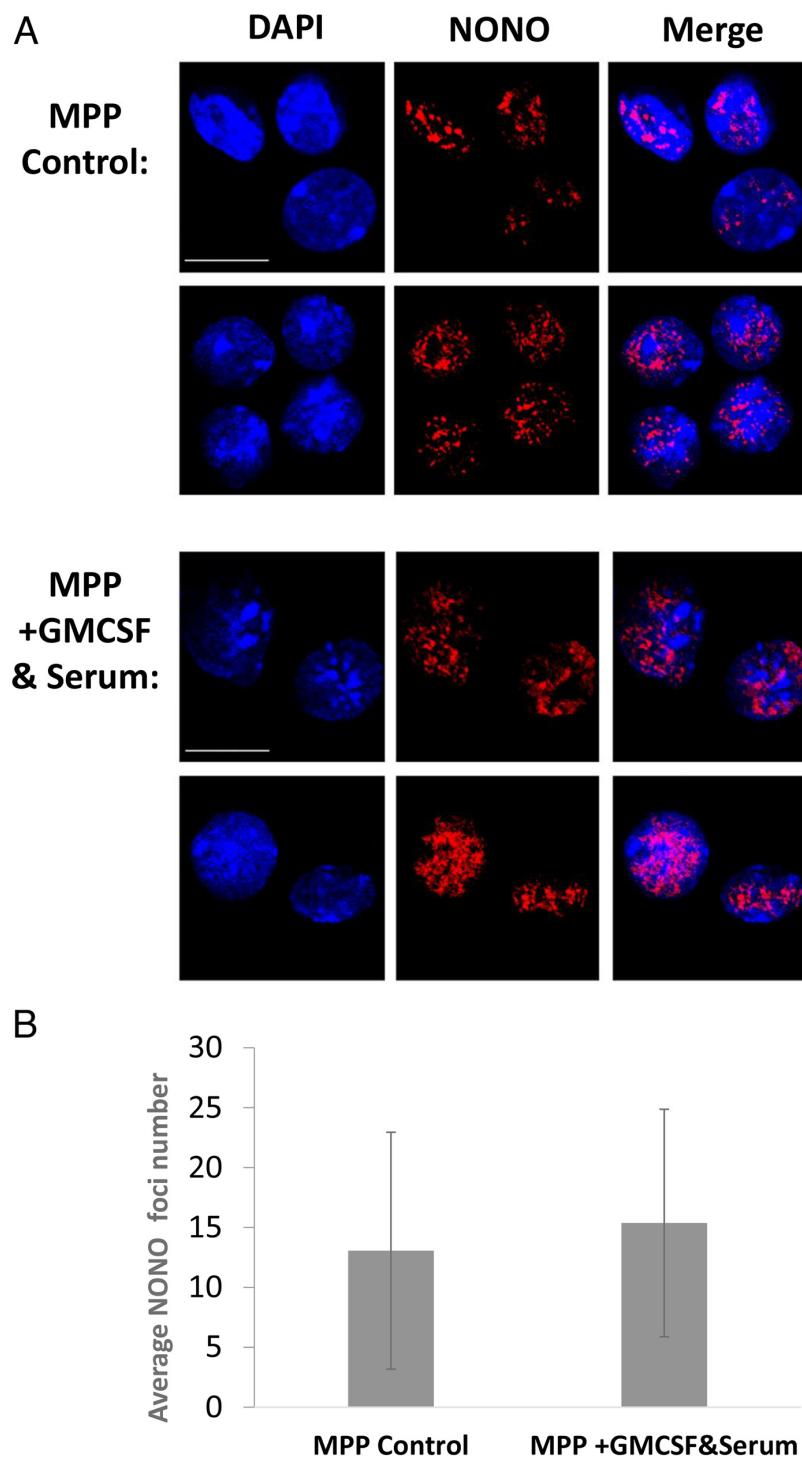

**Supplementary Figure 4: NONO sustains aggregated nuclear expression in cultured cells.** (A) Confocal microscopy immunofluorescent analysis of NONO. Representative images are shown from independent experiments and a total of 5 biological replicates. Scale bar denotes 10  $\mu$ m. (B) Quantification of the NONO foci number in cultured MPPs with and without the addition of GM-CSF and serum, by CellProfiler software. Histograms show averages  $\pm$ SD.

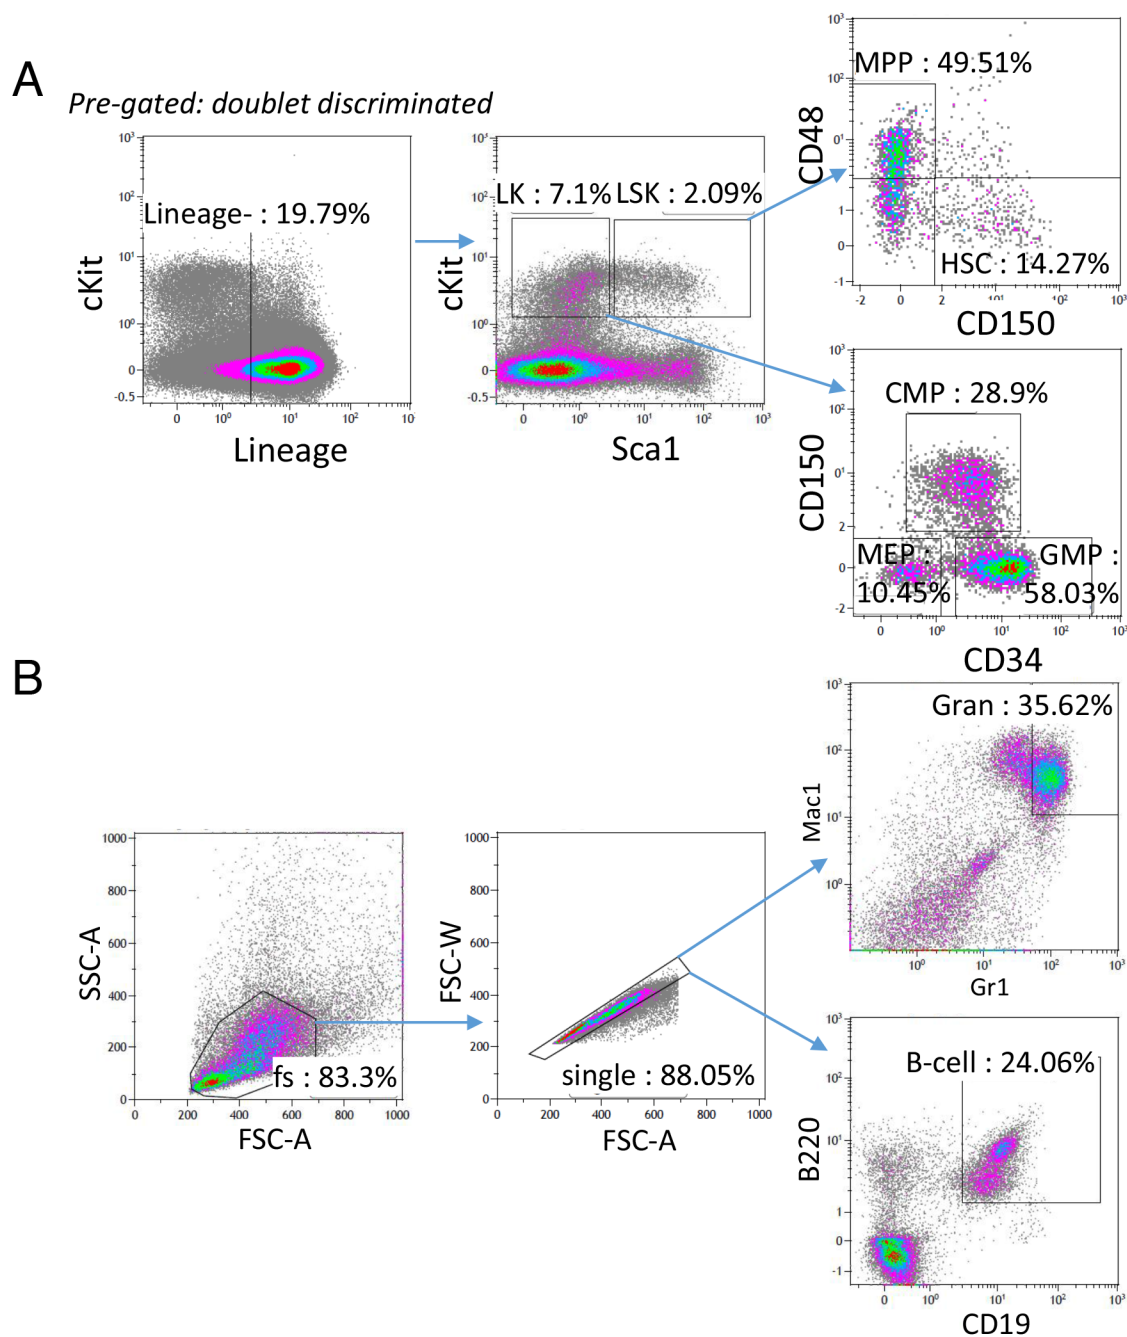

**Supplementary Figure 5: FACS gating for the isolation of primary HSCs, progenitors and effector immune cells. (A)** Gating strategies used to isolate HSC (Lineage<sup>-</sup>, Sca1<sup>+</sup>, cKit<sup>+</sup>, CD48<sup>+</sup>, CD150<sup>+</sup>), MPP (Lineage<sup>-</sup>, Sca1<sup>+</sup>, cKit<sup>+</sup>, CD48<sup>+</sup>, CD150<sup>-</sup>), CMP (Lineage<sup>-</sup>, Sca1<sup>-</sup>, cKit<sup>+</sup>, CD34<sup>med</sup>, CD150<sup>+</sup>), GMP (Lineage<sup>-</sup>, Sca1<sup>-</sup>, cKit<sup>+</sup>, CD34<sup>high</sup>, CD150<sup>-</sup>), MEP, (Lineage<sup>-</sup>, Sca1<sup>-</sup>, cKit<sup>+</sup>, CD34<sup>+</sup>, CD150<sup>-</sup>). **(B)** Gating strategies used to isolate granulocytes (Mac1<sup>+</sup>, Gr1<sup>+</sup>), and B-Cells (B220<sup>+</sup>, CD19<sup>+</sup>).
